# Supplementary material for: An earthquake gap south of Istanbul
Source: Springer Nature journal article supplement (doi:10.1038/ncomms2999), 2013-06-18
Supplement: 41467_2013_BFncomms2999_MOESM277_ESM.pdf [file 41467_2013_BFncomms2999_MOESM277_ESM.pdf]

Supplementary information:

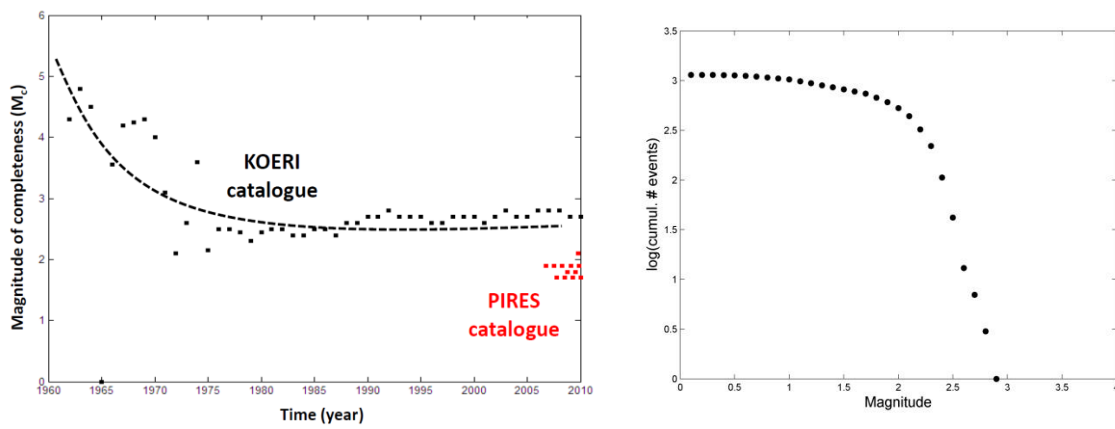

Supplementary Figure S1: Left: Magnitude of completeness in the eastern Sea of Marmara region since 1960 as obtained from the regional permanent seismic network operated by KOERI (Kandilli Observatory and Earthquake Research Institute, Istanbul) (black dots) and from the local seismic network deployed on the Princes Islands in 2006 (PIRES) (red dots). Right: Magnitude-frequency plot for the PIRES catalogue (four-year time period).
